# Supplementary material
Source: PubMed Central journal article supplement (PMC2775065)
Supplement: NIHMS155548-supplement-Supporting_Information.pdf [file NIHMS155548-supplement-Supporting_Information.pdf]

# Construction of Multifunctional Cubeoctahedra via Coordination-Driven Self-Assembly

Koushik Ghosh<sup>†</sup>, Jiming Hu<sup>†,‡</sup>, Henry S. White<sup>†\*</sup>, Peter J. Stang<sup>†\*</sup>

<sup>†</sup>*Department of Chemistry, University of Utah, 315 South 1400 East, Room, 2020, Salt Lake City, Utah, 84112*

<sup>‡</sup>*Department of Chemistry, Zhejiang University, Hangzhou 310027, China*

stang@chem.utah.edu

## Table of Contents

|                                                                                             |     |
|---------------------------------------------------------------------------------------------|-----|
| The Synthesis of Compounds <b>4</b> and <b>5</b> .....                                      | S2  |
| <sup>1</sup> H and <sup>31</sup> P NMR Spectra of cubeoctahedra <b>4</b> and <b>5</b> ..... | S3  |
| ESI Mass Spectra of <b>4</b> .....                                                          | S9  |
| PGSE experiments .....                                                                      | S11 |
| Electrochemical Measurements.....                                                           | S12 |
| Computational Procedures and Calculated Models for <b>5</b> , <b>6</b> and <b>7</b> .....   | S15 |

### General Procedure for the Preparation of Cubeoctahedra 4 and 5:

To a 0.5 mL acetone-*d*<sub>6</sub> solution triflate (for **1**, 5.0 mg, 0.0037 mmol; for **2**, 3.95mg, 0.0037 mmol) was added a 0.5 mL CD<sub>2</sub>Cl<sub>2</sub> solution of the tritopic donor precursor **3** drop by drop with continuous stirring (10 min). The reaction mixture was stirred for 12 hrs at room temperature. The solution was evaporated to dryness, and the product was collected.

**4.** Yield: 6.54 mg (orange solid), 95%. <sup>1</sup>H NMR (CD<sub>2</sub>Cl<sub>2</sub>, 500 MHz): δ = 8.81 (d, 48H, H<sub>α</sub>-Py), 8.08 (s, 24H, Ar-H), 7.96 (s, 48H, ArH), 7.12-6.99 (m, 36H, ArH), 4.96 (s, 24H, H<sub>Fc</sub>), 4.62 (s, 24H, H<sub>Fc</sub>), 4.36 (s, 60H, H<sub>Fc</sub>), 1.96 (m, 288H, PCH<sub>2</sub>CH<sub>3</sub>), 1.25 (m, 432H, PCH<sub>2</sub>CH<sub>3</sub>). <sup>31</sup>P{<sup>1</sup>H} NMR (CD<sub>2</sub>Cl<sub>2</sub>, 121.4 MHz): δ = 16.9 (s, <sup>1</sup>J<sub>Pt-P</sub> = 2311.5 Hz). Anal. Calcd for C<sub>780</sub>H<sub>984</sub>F<sub>72</sub>Fe<sub>12</sub>N<sub>24</sub>O<sub>96</sub>P<sub>48</sub>Pt<sub>24</sub>S<sub>24</sub>: C, 44.17; H, 4.68; N, 1.59. Found: C, 44.20; H, 4.87; N, 1.57.

**5.** Yield: 5.71 mg (white solid), 98%. <sup>1</sup>H NMR (CD<sub>2</sub>Cl<sub>2</sub>, 500 MHz): δ 8.66 (brs, 48H, H<sub>α</sub>-Py), 8.08 (s, 24H, ArH), 7.86 (brs, 48H, H<sub>β</sub>-Py), 7.68 (s, 12H, ArH), 7.1-6.89 (m, 60H, ArH), 4.23-4.08 (m, 96H, α-CH<sub>2</sub>), 3.91-3.85 (m, 96H, β-CH<sub>2</sub>), 3.75 (m, 96H, γ-CH<sub>2</sub>), 1.8 (m, 288H, PCH<sub>2</sub>), 1.23 (m, 432H, PCH<sub>2</sub>CH<sub>3</sub>). <sup>31</sup>P {<sup>1</sup>H} NMR ( CD<sub>2</sub>Cl<sub>2</sub>, 121.4 MHz): δ=18.1 (s, <sup>1</sup>J<sub>Pt-P</sub> = 2729.31 Hz). Anal. Calcd for C<sub>948</sub>H<sub>1248</sub>F<sub>72</sub>N<sub>24</sub>O<sub>192</sub>P<sub>48</sub>Pt<sub>24</sub>S<sub>24</sub>: C, 46.75; H, 5.16; N, 1.38. Found: C, 46.87; H, 5.20; N, 1.41.

**Figure S1.** A)  $^1\text{H}$  and B)  $^{31}\text{P}$  NMR Spectra of cubeoctahedra **4** in  $\text{CD}_2\text{Cl}_2$

**A.**

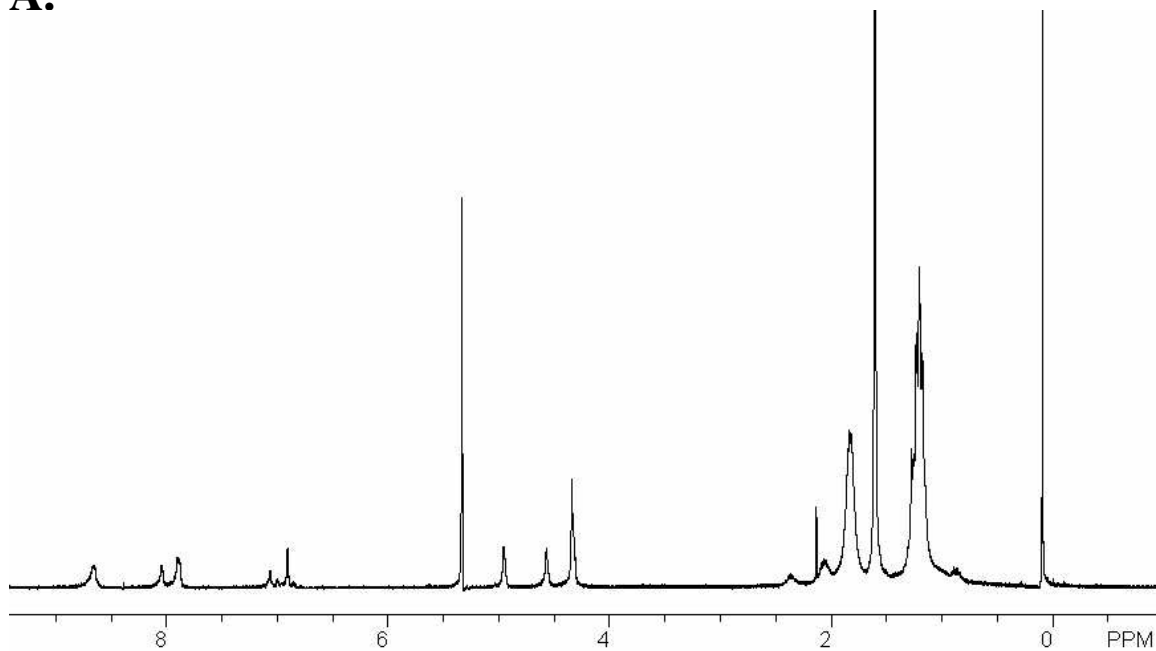

**B**

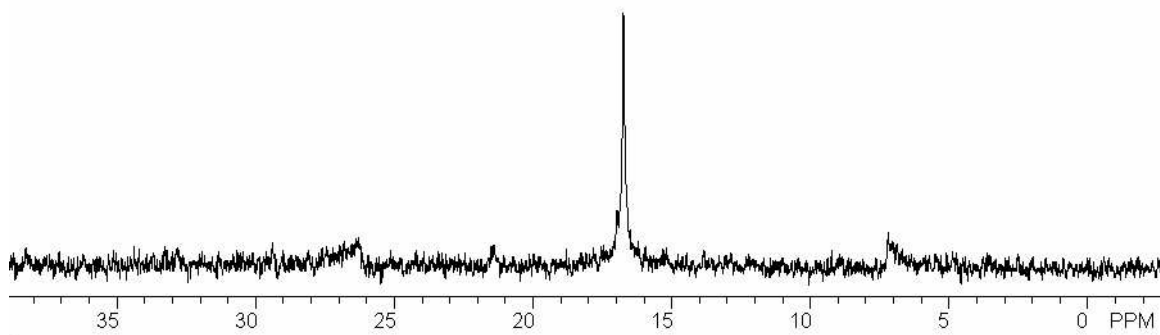

**Figure S2.** A)  $^1\text{H}$  and B)  $^{31}\text{P}$  NMR Spectra of Cubeoctahedra **4** in Acetone- $d_6$

**A.**

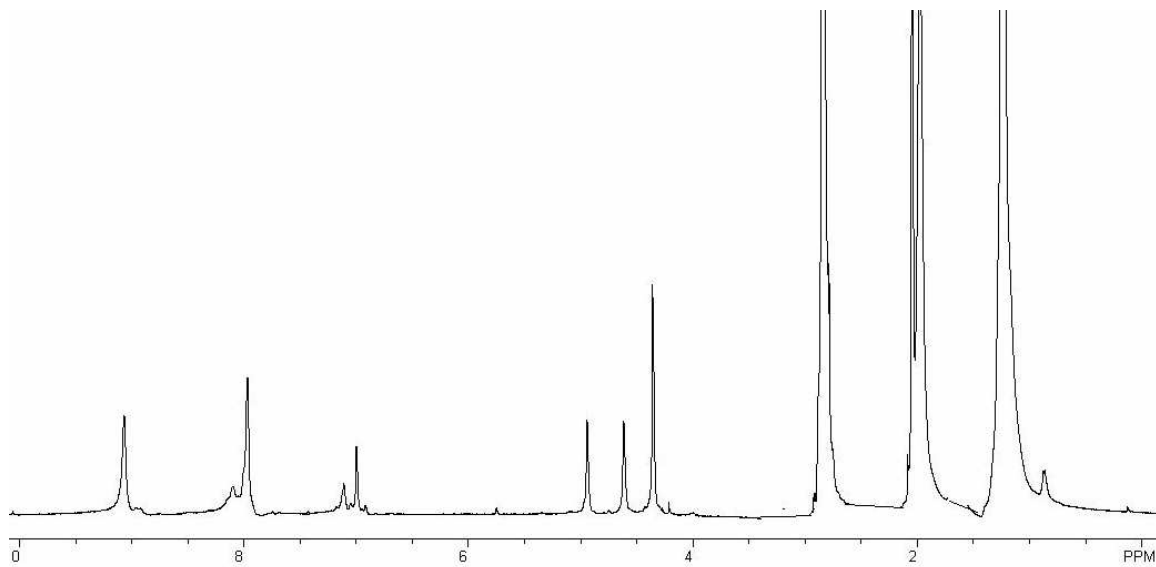

**B.**

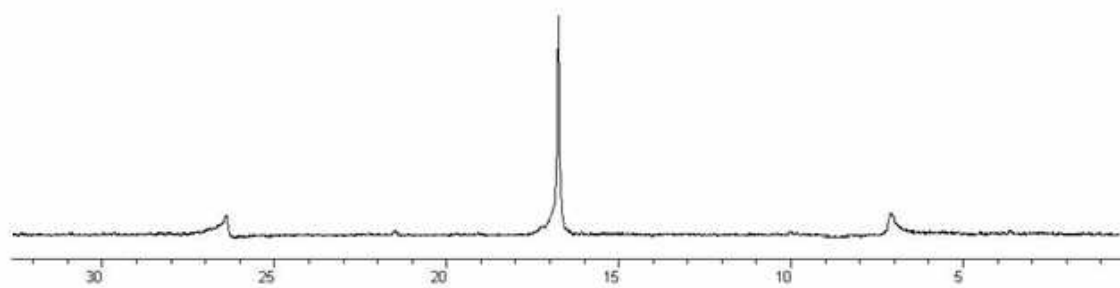

**Figure S3.** A)  $^1\text{H}$  and B)  $^{31}\text{P}$  NMR Spectra of Cubeoctahedra **4** in  $\text{CD}_3\text{NO}_2$

**A.**

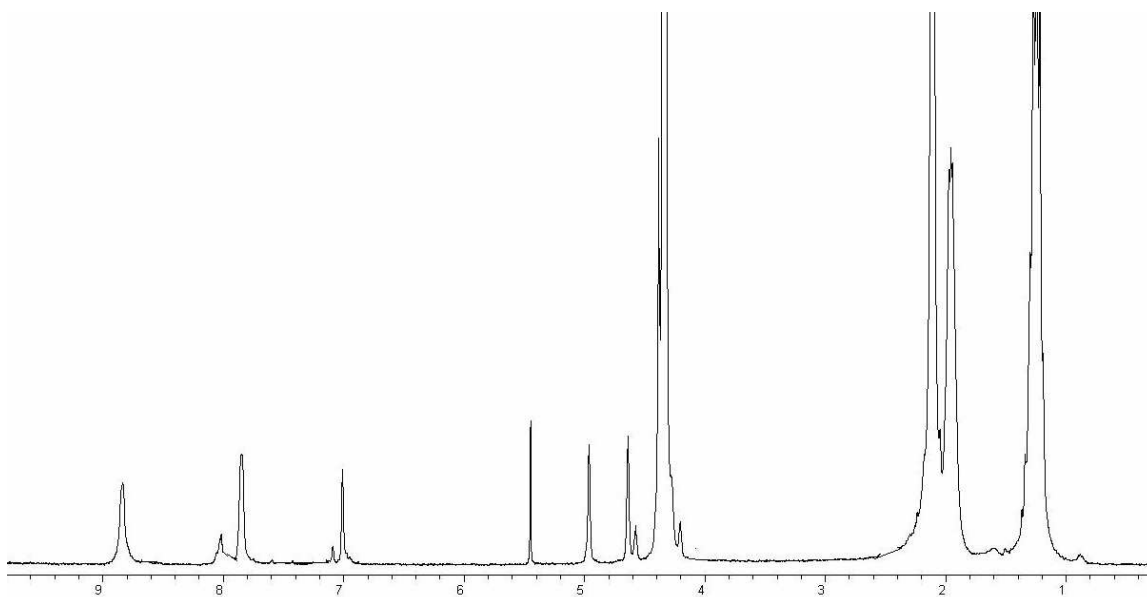

**B.**

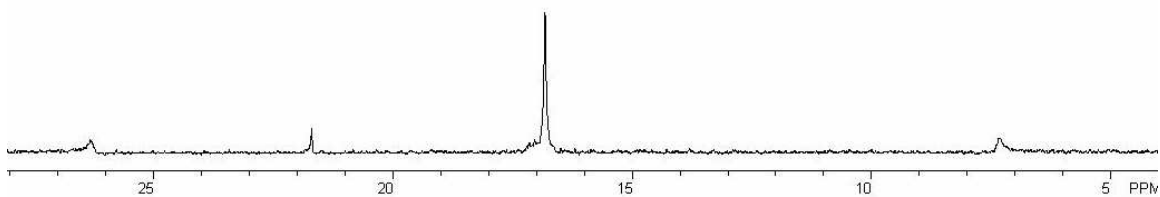

**Figure S4.** A)  $^1\text{H}$  and B)  $^{31}\text{P}$  NMR Spectra of Cubeoctahedra **5** in  $\text{CD}_2\text{Cl}_2$

A.

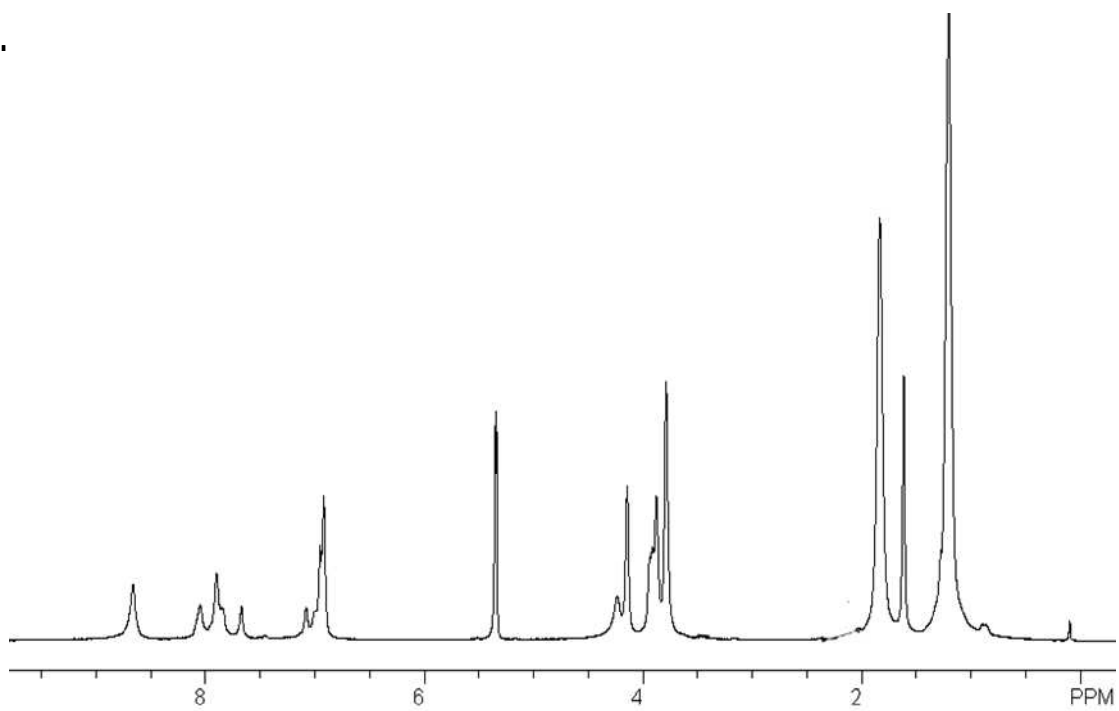

B.

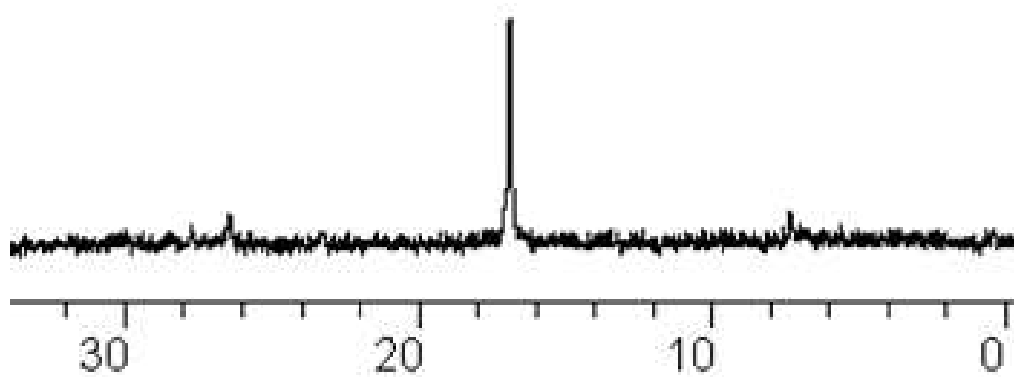

**Figure S5.** A)  $^1\text{H}$  and B)  $^{31}\text{P}$  NMR Spectra of Cubeoctahedra **5** in Acetone- $d_6$

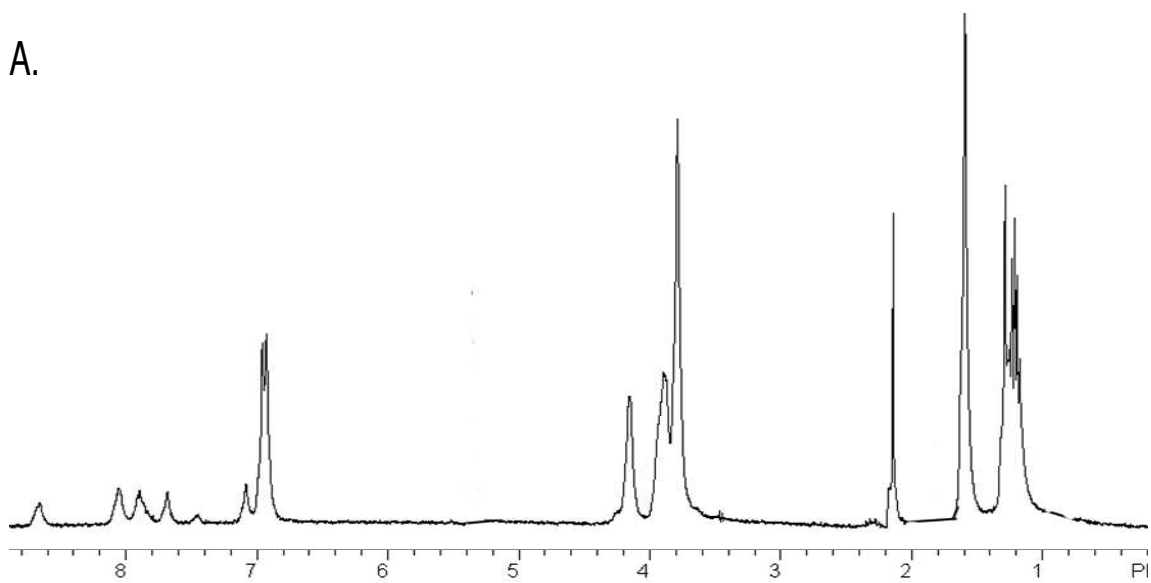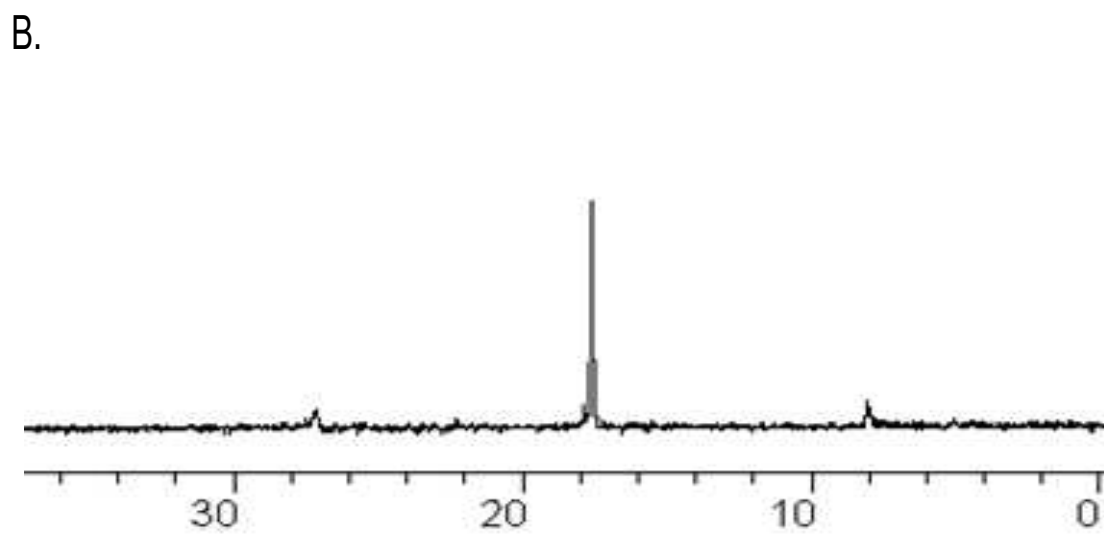

**Figure S6.** A)  $^1\text{H}$  and B)  $^{31}\text{P}$  NMR Spectra of Cubeoctahedra **5** in  $\text{CD}_3\text{NO}_2$

**A.**

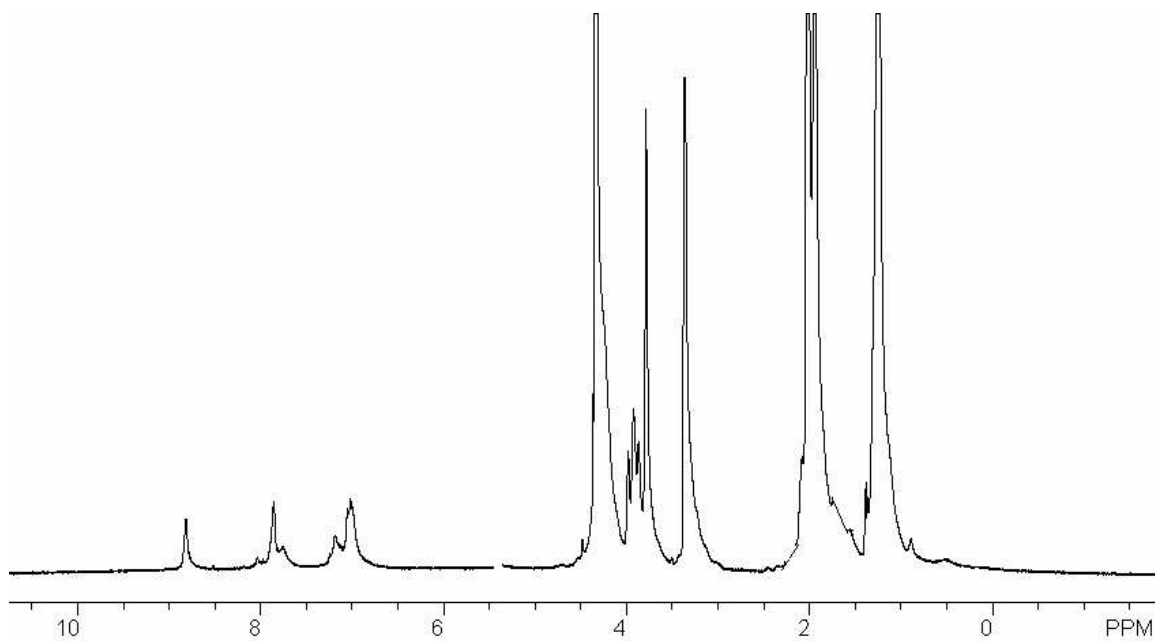

**B.**

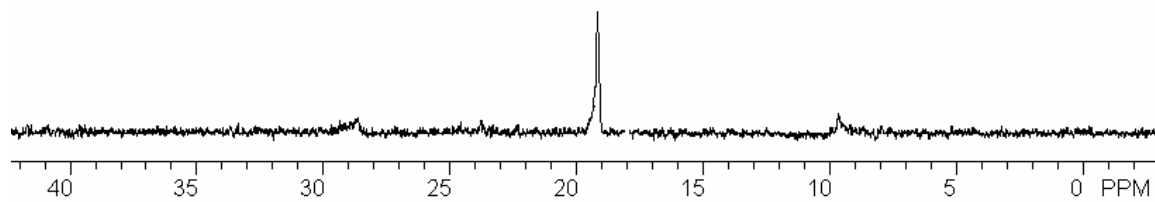



**Figure S7: ESI Mass Spectrometry of 4:**

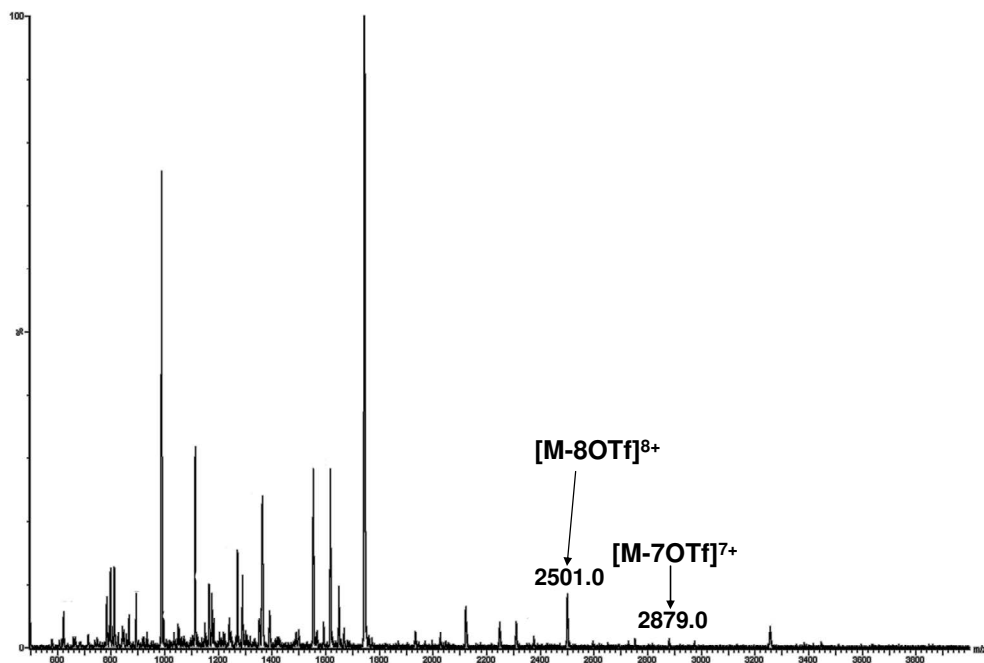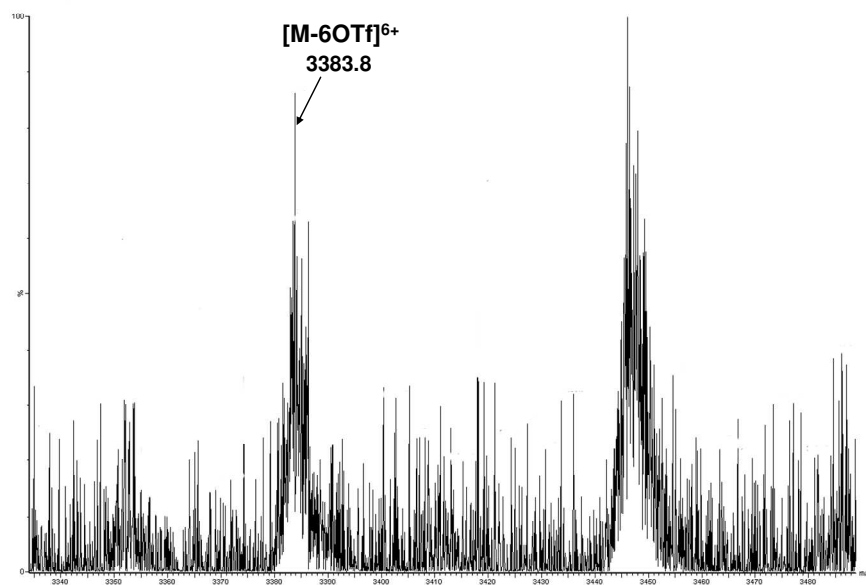

**PGSE Measurement:**

Pulsed gradient spin-echo (PGSE) NMR diffusion measurements were done by pulse-sequence developed by Stejskal and Tanner<sup>1</sup>.

$$\ln(I/I_0) = -\gamma_X^2 \delta^2 G^2 (\Delta - \delta/3) D \quad (1)$$

$\gamma_X$  = gyromagnetic ratio of the X nucleus;  
 $\delta$  = length of the gradient pulse;  $G$  = gradient strength;  
 $\Delta$  = delay between the midpoints of the gradients;  
 $D$  = diffusion coefficient

**Temp:** 298K

**Instrument:** Inova 500 MHz

**Stokes-Einstein Equation:** The molecular size is obtained from the diffusion coefficient via the Stokes-Einstein equation where  $k_B$  is the Boltzmann constant,  $T$  is the absolute temperature and  $r_H$  is the hydrodynamic radius of the species under investigation.

$$D = \frac{k_B T}{6\pi \eta r}$$

**Gradient Calibration:** The gradient strengths need to be carefully calibrated to obtain accurate  $D$  values to fit equation 1. Gradient strengths were calibrated using the width (in Hz) of a sample of known length along the NMR-tube ( $Z$ ) axis, back-calculation of the coil constant from a diffusion experiment on  $D_2O$  using  $D = 1.9 \times 10^{-5} \text{ cm}^2/\text{s}$  for  $D_2O$  at 298K<sup>2</sup> was used to calculate the gradient strengths of both the probes.

**Issue of Viscosity:** The effect of variable viscosity in different batch of same solvents was examined using the D values observed for the residual protons of the solvent resonance.

**Pulse sequence:** Stejskal-Tanner Pulse sequence

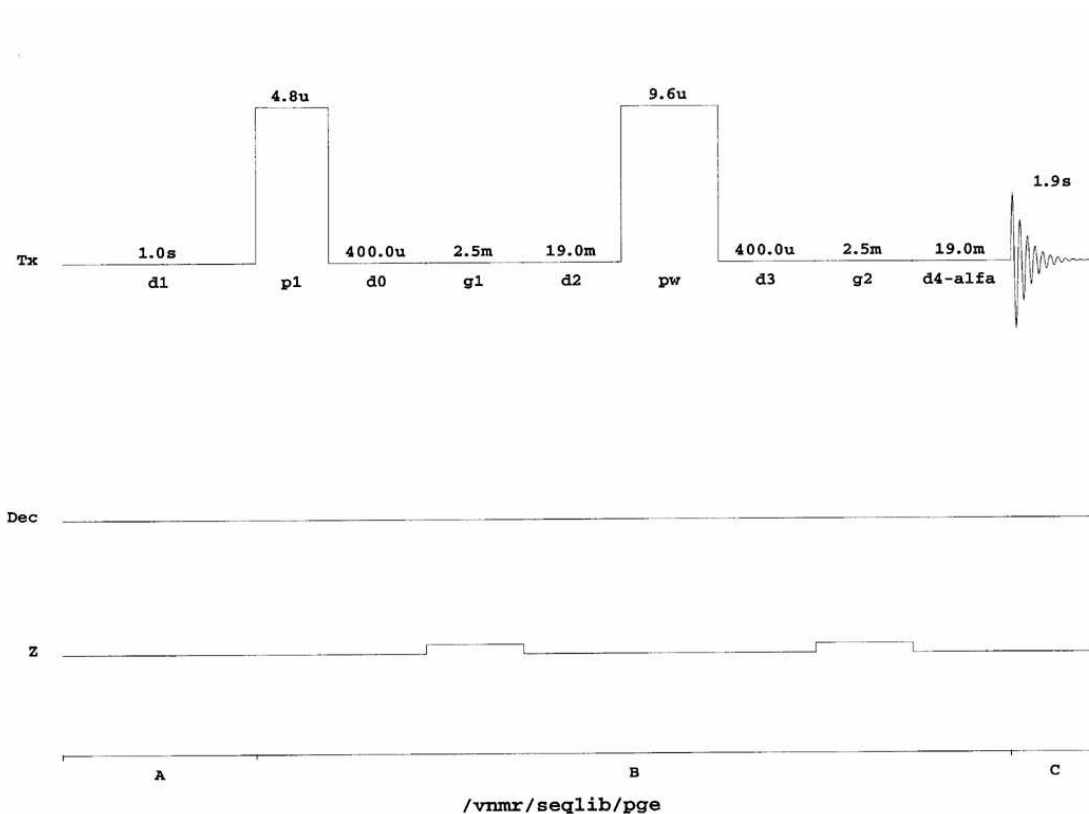

**Diffusion Coefficients in different solvents:**

|   | $D_{\text{acetone}} (10^{-6} \text{cm}^2/\text{s})$ | $D_{\text{dichloromethane}} (10^{-6} \text{cm}^2/\text{s})$ | $D_{\text{nitromethane}} (10^{-6} \text{cm}^2/\text{s})$ |
|---|-----------------------------------------------------|-------------------------------------------------------------|----------------------------------------------------------|
| 4 | $2.12 \pm 0.1$                                      | $1.59 \pm 0.2$                                              | $1.1 \pm 0.1$                                            |
| 5 | $1.82 \pm 0.1$                                      | $1.45 \pm 0.1$                                              | $0.92 \pm 0.1$                                           |

### Cyclic Voltammetry.

Cyclic voltammetry (CV) was performed in a Faraday cage using a 3-electrode cell and a potentiostat (Pine Instrument Co., RDE4). The working electrode was a platinum disk embedded in glass with surface area of about 1 mm<sup>2</sup>. A Ag/AgCl (3.0M KCl) electrode was used as reference electrode and a Pt wire as the counter. Voltammetric data were recorded using in-house virtual instrumentation written in LabVIEW 8.0 (National Instrument).

The CV measurements were carried out in a acetone solution containing 0.1 M tetra-*n*-butylammonium hexafluorophosphate (*n*-Bu<sub>4</sub>NPF<sub>6</sub>). The concentration of redox molecule in solution was: (4) cubeoctahedra, 2.0×10<sup>-6</sup> M, Scan rates are indicated in the figures.

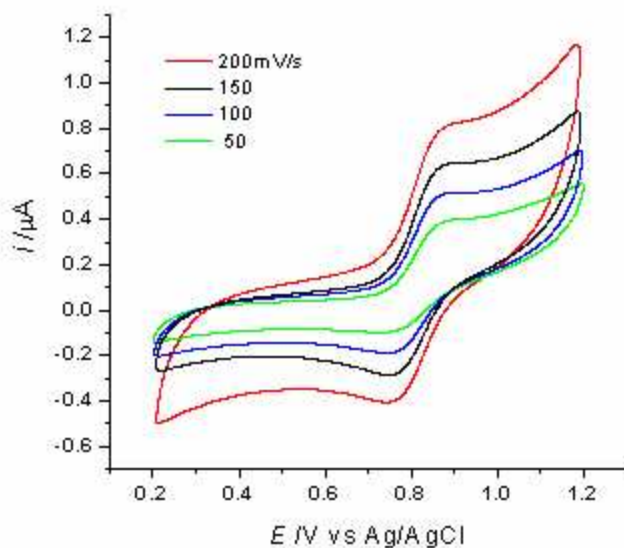

**Figure S8.** Cyclic voltammetric response of 2.0×10<sup>-6</sup> M cubeoctahedra **4** in acetone containing 0.1M *n*-Bu<sub>4</sub>NPF<sub>6</sub>.

### Steady-State Measurements using Pt microdisk electrodes.

Steady-state voltammetric measurements were made using the same solution, but a two electrode compartment using a 26  $\mu\text{m}$  diameter Pt disk with the diameter of as the working and a Ag/AgCl electrode as the counter and reference). A PAR (Princeton Applied Research) model 175 Universal Programmer and Dagan Cornerstone Chem-Clamp Potentiostat were used for potential generation and current measurement, respectively. The size of this micro-Pt disk was determined by steady-state voltammetric measurement using an acetonitrile solution containing 5.0 mM ferrocene and 0.1M TBAPF<sub>6</sub>.

. The limiting current can be calculated from the equation:

$$i_{\text{lim}} = 4nFDaC\theta_{\text{sites}} \quad (1)$$

where  $n$  is the number of electrons transferred per ferrocene (=1),  $F$  is the Faraday constant  $C$  is the bulk concentration,  $\theta_{\text{sites}}$  is the number of reacting ferrocenyl sites per the redox molecule, and  $a$  is the radius of the electrode.

To determine if the oxidation of the compounds correspond to independent serial electron transfer reactions, the current function  $\log[(i_{\text{lim}}-i)/i]$  from the steady-state voltammograms was plotted vs  $E$ . For this compound, the slope (ca 1mV) corresponded closely to the one-electron value, (59 mV for  $n = 1$ ) supporting the conclusion that oxidation of the ferrocenyl groups occurs independently of one another.

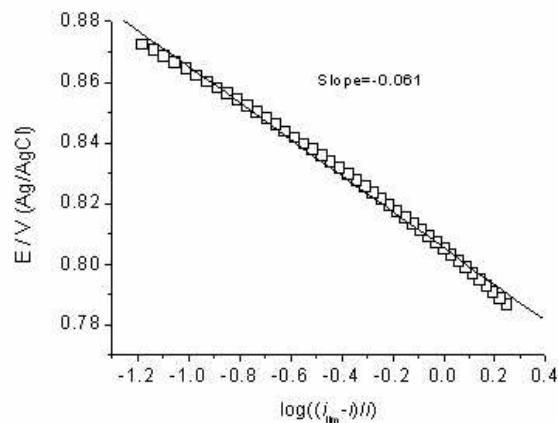

**Figure S9.** Plot of  $\log[(i_{\text{lim}}-i)/i]$  vs  $E$  from the steady-state measurements using a Pt microelectrode: Dots are the experimental data and black lines represent best fit lines to the data.

### Chronoamperometry Measurements

Chronoamperometry was performed by stepping the electrode potential from a value where no electron transfer occurred to a value where the oxidation of the redox molecule was diffusion limited. The normalized time-dependent current with respect to the steady-state limiting current ( $i_{\text{lim}}$ ) of a microdisk can be expressed as:<sup>3</sup>

$$\frac{i(t)}{i_{\text{lim}}} = 1 + (2/\pi^{3/2})a(Dt)^{-1/2}$$

Thus, by plotting  $i(t)/i_{\text{lim}}$  vs  $t^{-1/2}$ ,  $D$  can be evaluated from the slope when  $a$  is known.

Figure S7 shows two examples of  $i(t)/i_{\text{lim}}$  vs  $t^{-1/2}$  plots. The fitted slope value is 0.365 ( $\text{s}^{0.5}$ ).  $D$  is then calculated from equation (4) as  $2.18 \times 10^{-6} \text{cm}^2/\text{s}$ . By using  $D$  value,  $\theta_{\text{sites}}$  can be obtained from Eq. (3).

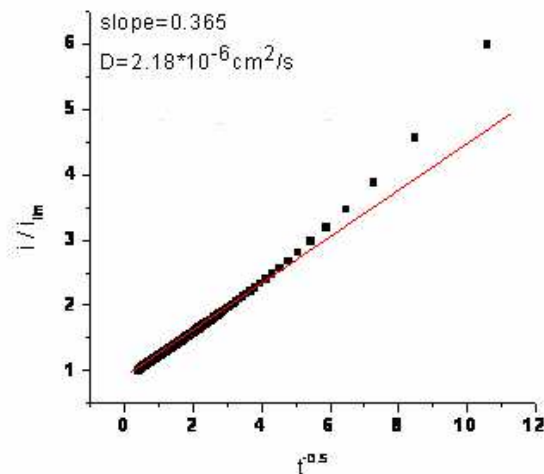

**Figure S10.** Plot of the experimental ratio  $i(t)/i_{lim}$  vs  $t^{-1/2}$  for the oxidation of **4** in acetone containing 0.1M  $n\text{-Bu}_4\text{N}^+\text{PF}_6^-$  using a 13 $\mu\text{m}$  microelectrode.

#### **Molecular Modeling Procedures:**

The molecular structures of multiferrocene complex **4** and multi-crownether complex **5** were constructed within the input mode of the program Maestro v8.0.110 with the OPLS force-field.<sup>4</sup> and MMFF force field respectively. A 1.0 ns molecular dynamics simulation (0.05 fs timestep) at a simulation temperature of 300 K was used to equilibrate each structure. Following each molecular dynamics simulation a full energy minimization was used to obtain the final optimized structures.

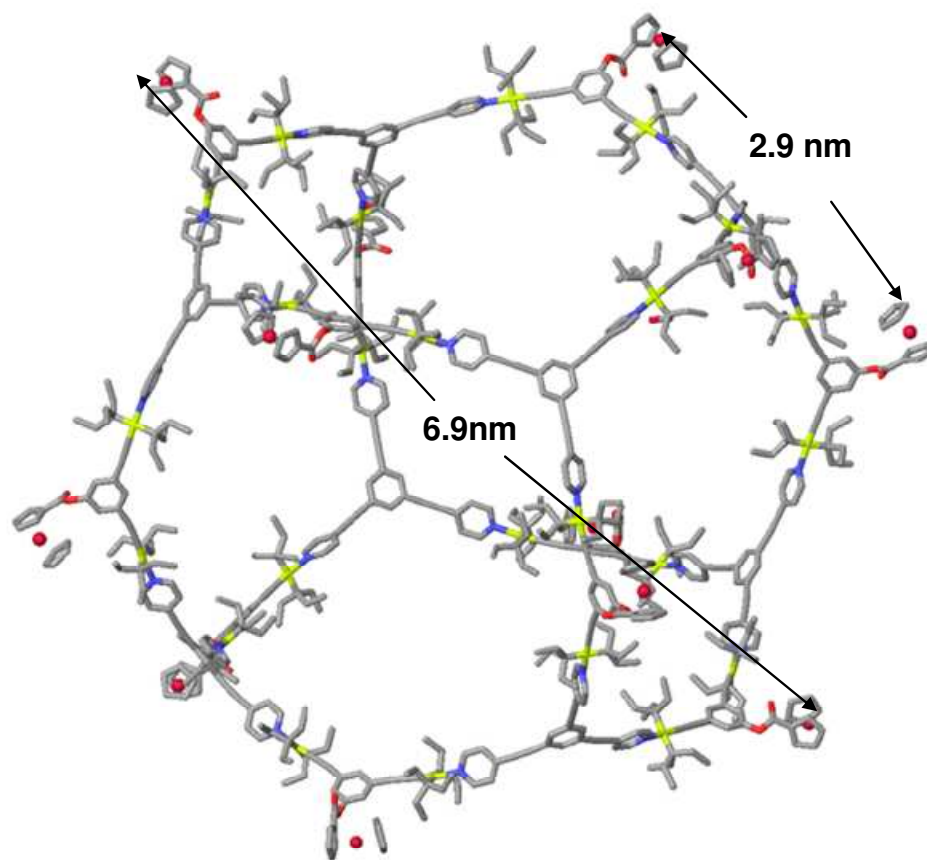

**Figure S11.** Simulated molecular model of multiferrocene **4** optimized with the OPLS force-field. All other hydrogen atoms have been removed for clarity.



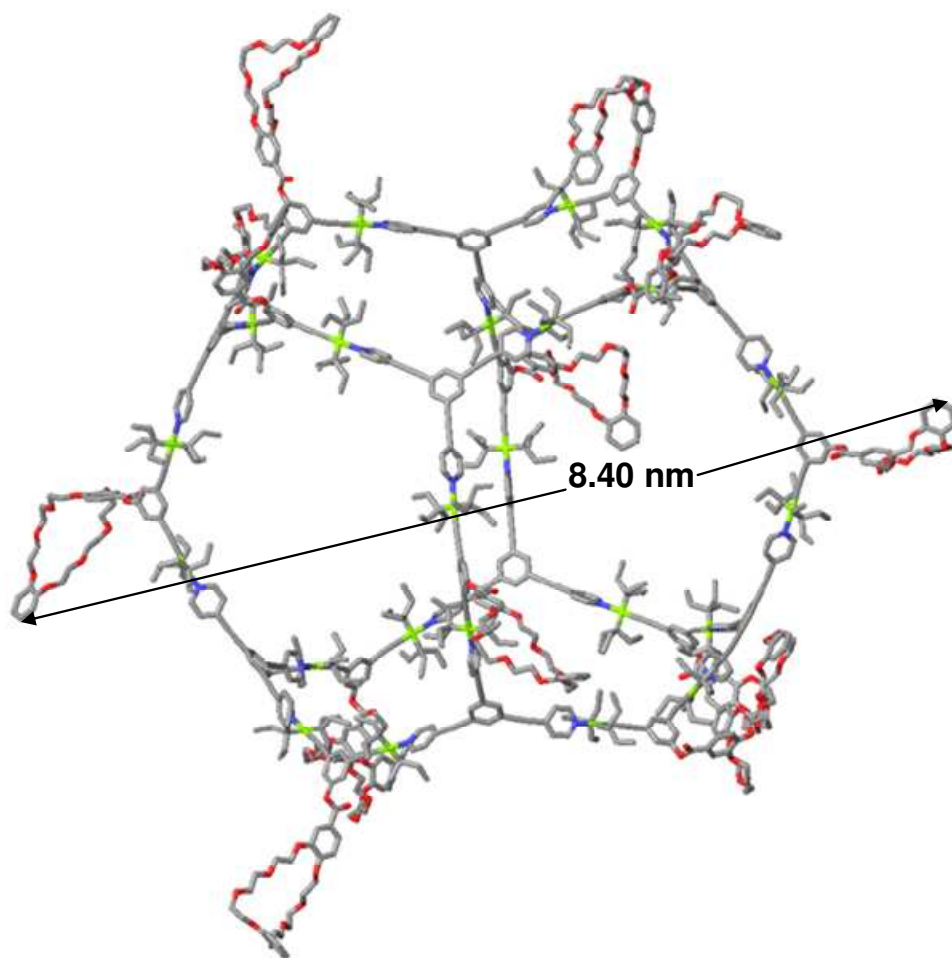

**Figure S12.** Simulated molecular model of multicrownether **5** optimized with the MMFF force-field. All other hydrogen atoms have been removed for clarity.

**References:**

1. Stejskal, E. O.; Tanner, J. E. *J. Chem. Phys.* **1965**, *42*, 288.
2. Longworth, L. G. *J. Phys. Chem.* **1960**, *64*, 1914.
3. Denault, G.; Mirkin, M. Bard, A. J.; *J. Electroanal. Chem.*, **1991**, *308*, 27
4. Mohamadi, F.; Richards, N. G. J.; Guida, W. C.; Liskamp, R.; Lipton, M.; Caufield, C.; Chang, G.; Hendrickson, T.; Still, W. C. *J. Comput. Chem.* **1990**, *11*, 440.

1.
